# Supplementary material
Source: ML conference proceedings conference paper supplement (https://openreview.net/forum?id=nubKjBbazd)

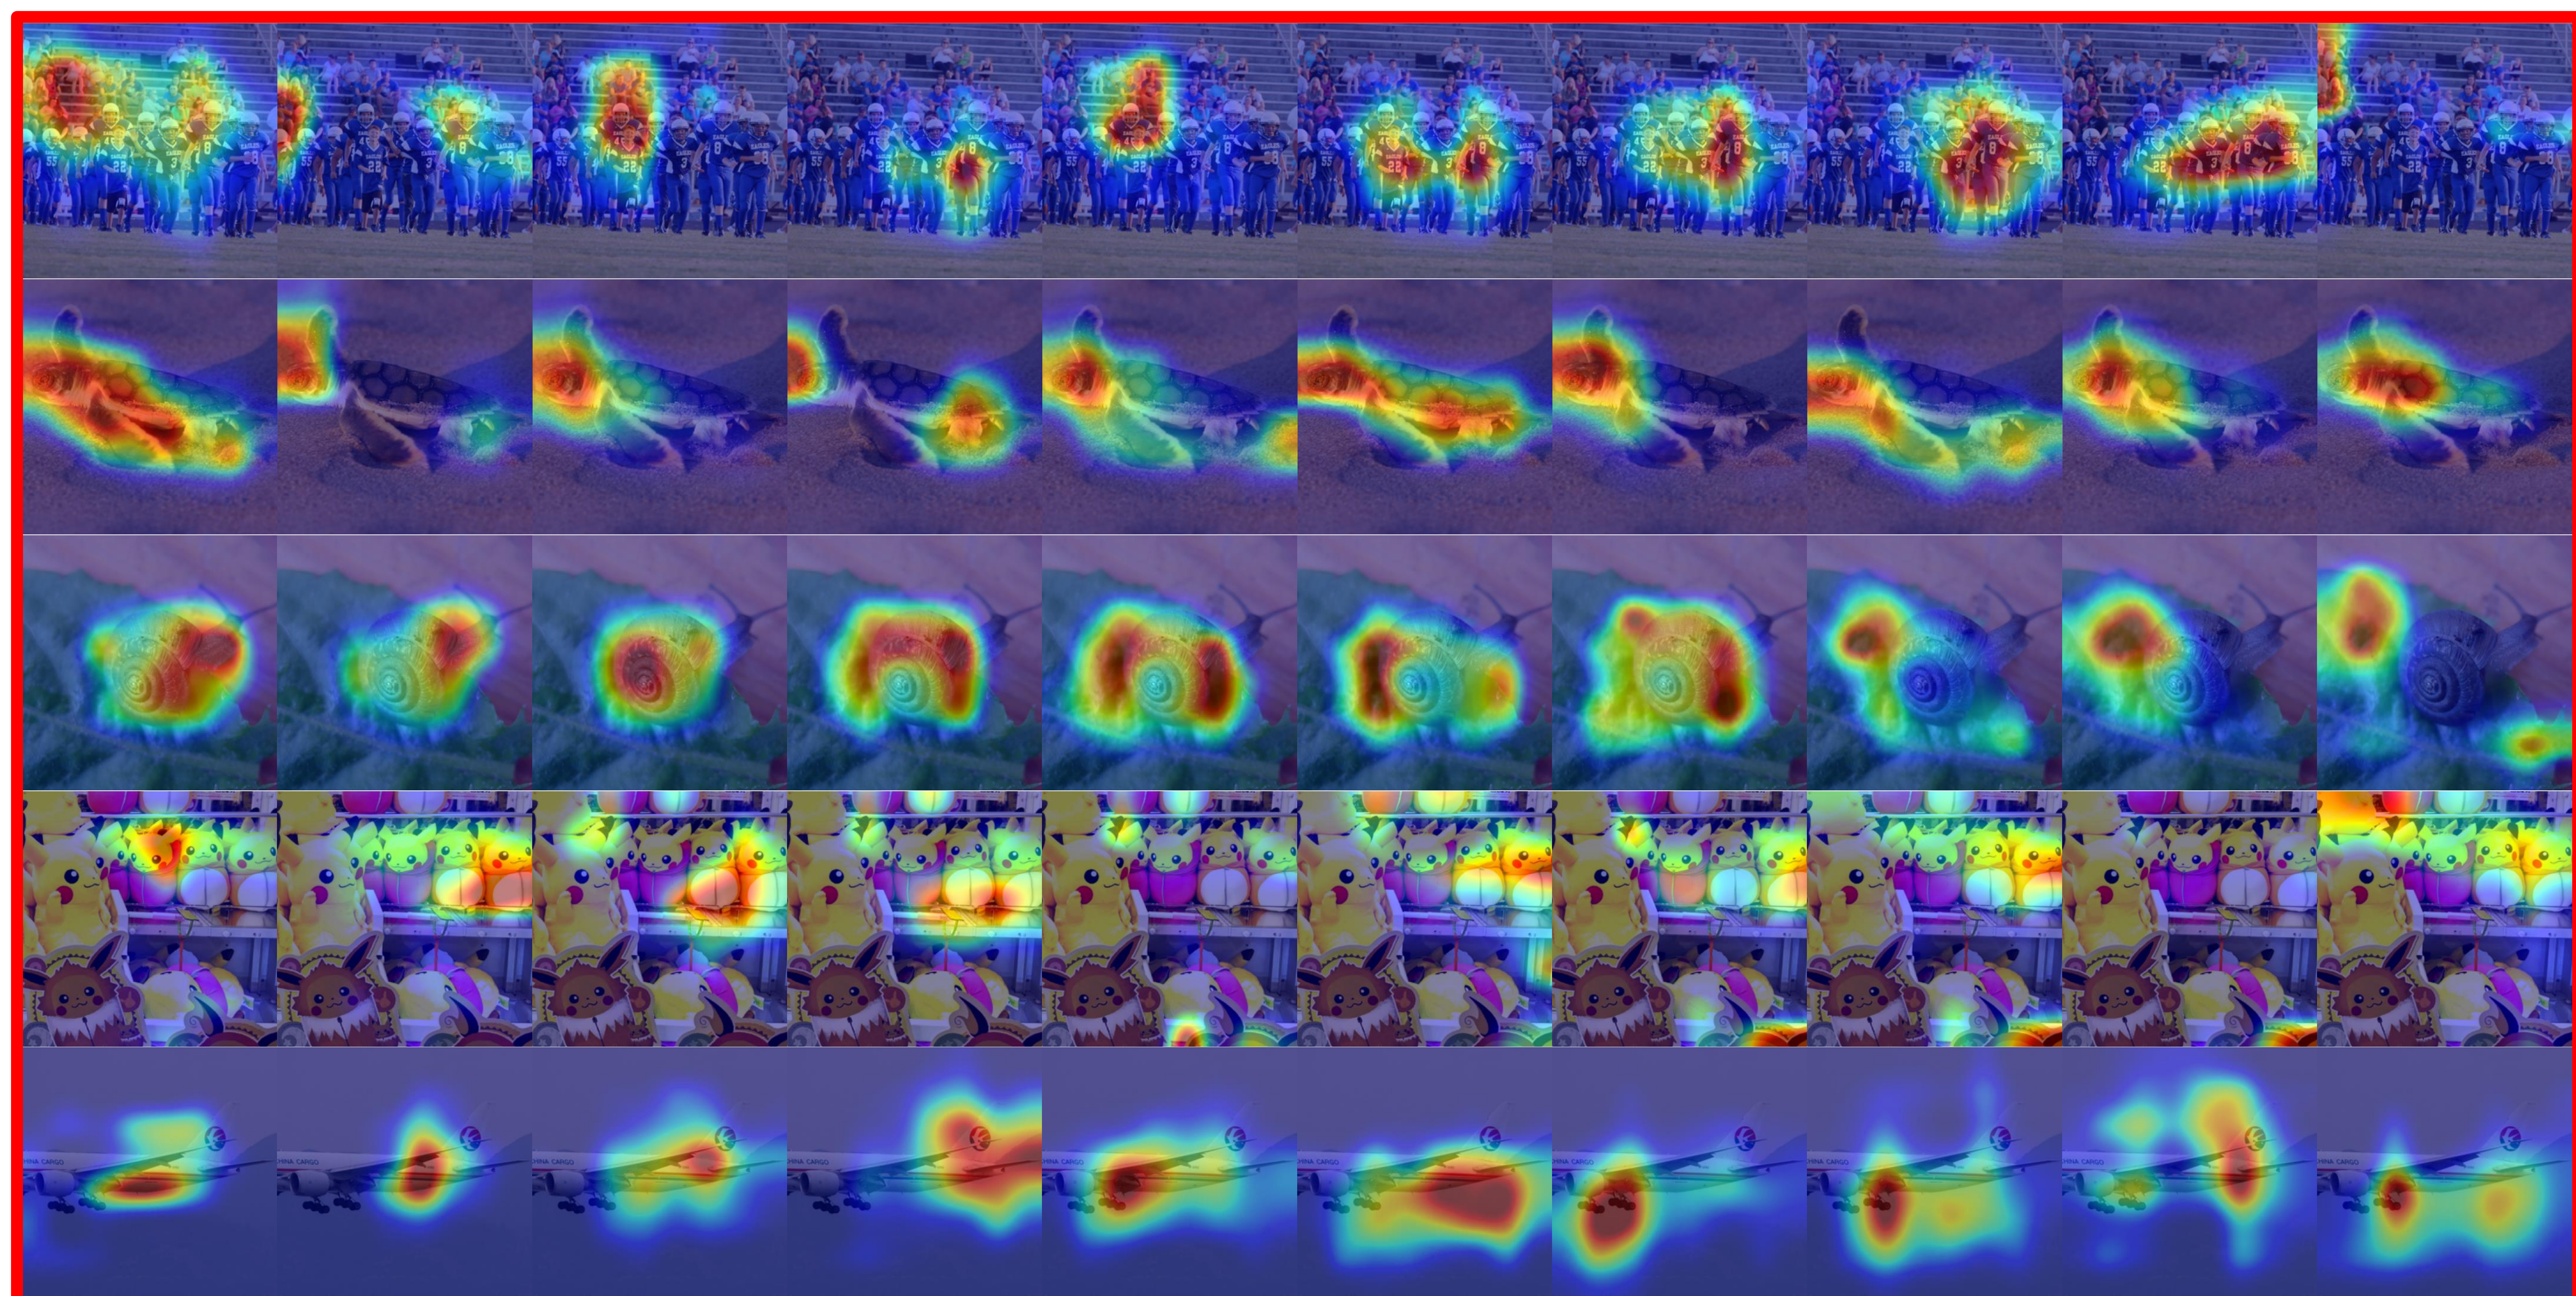

Iteration: 0

1

2

3

4

5

6

7

8

9

Supplement: supplementary_material [file attachment]

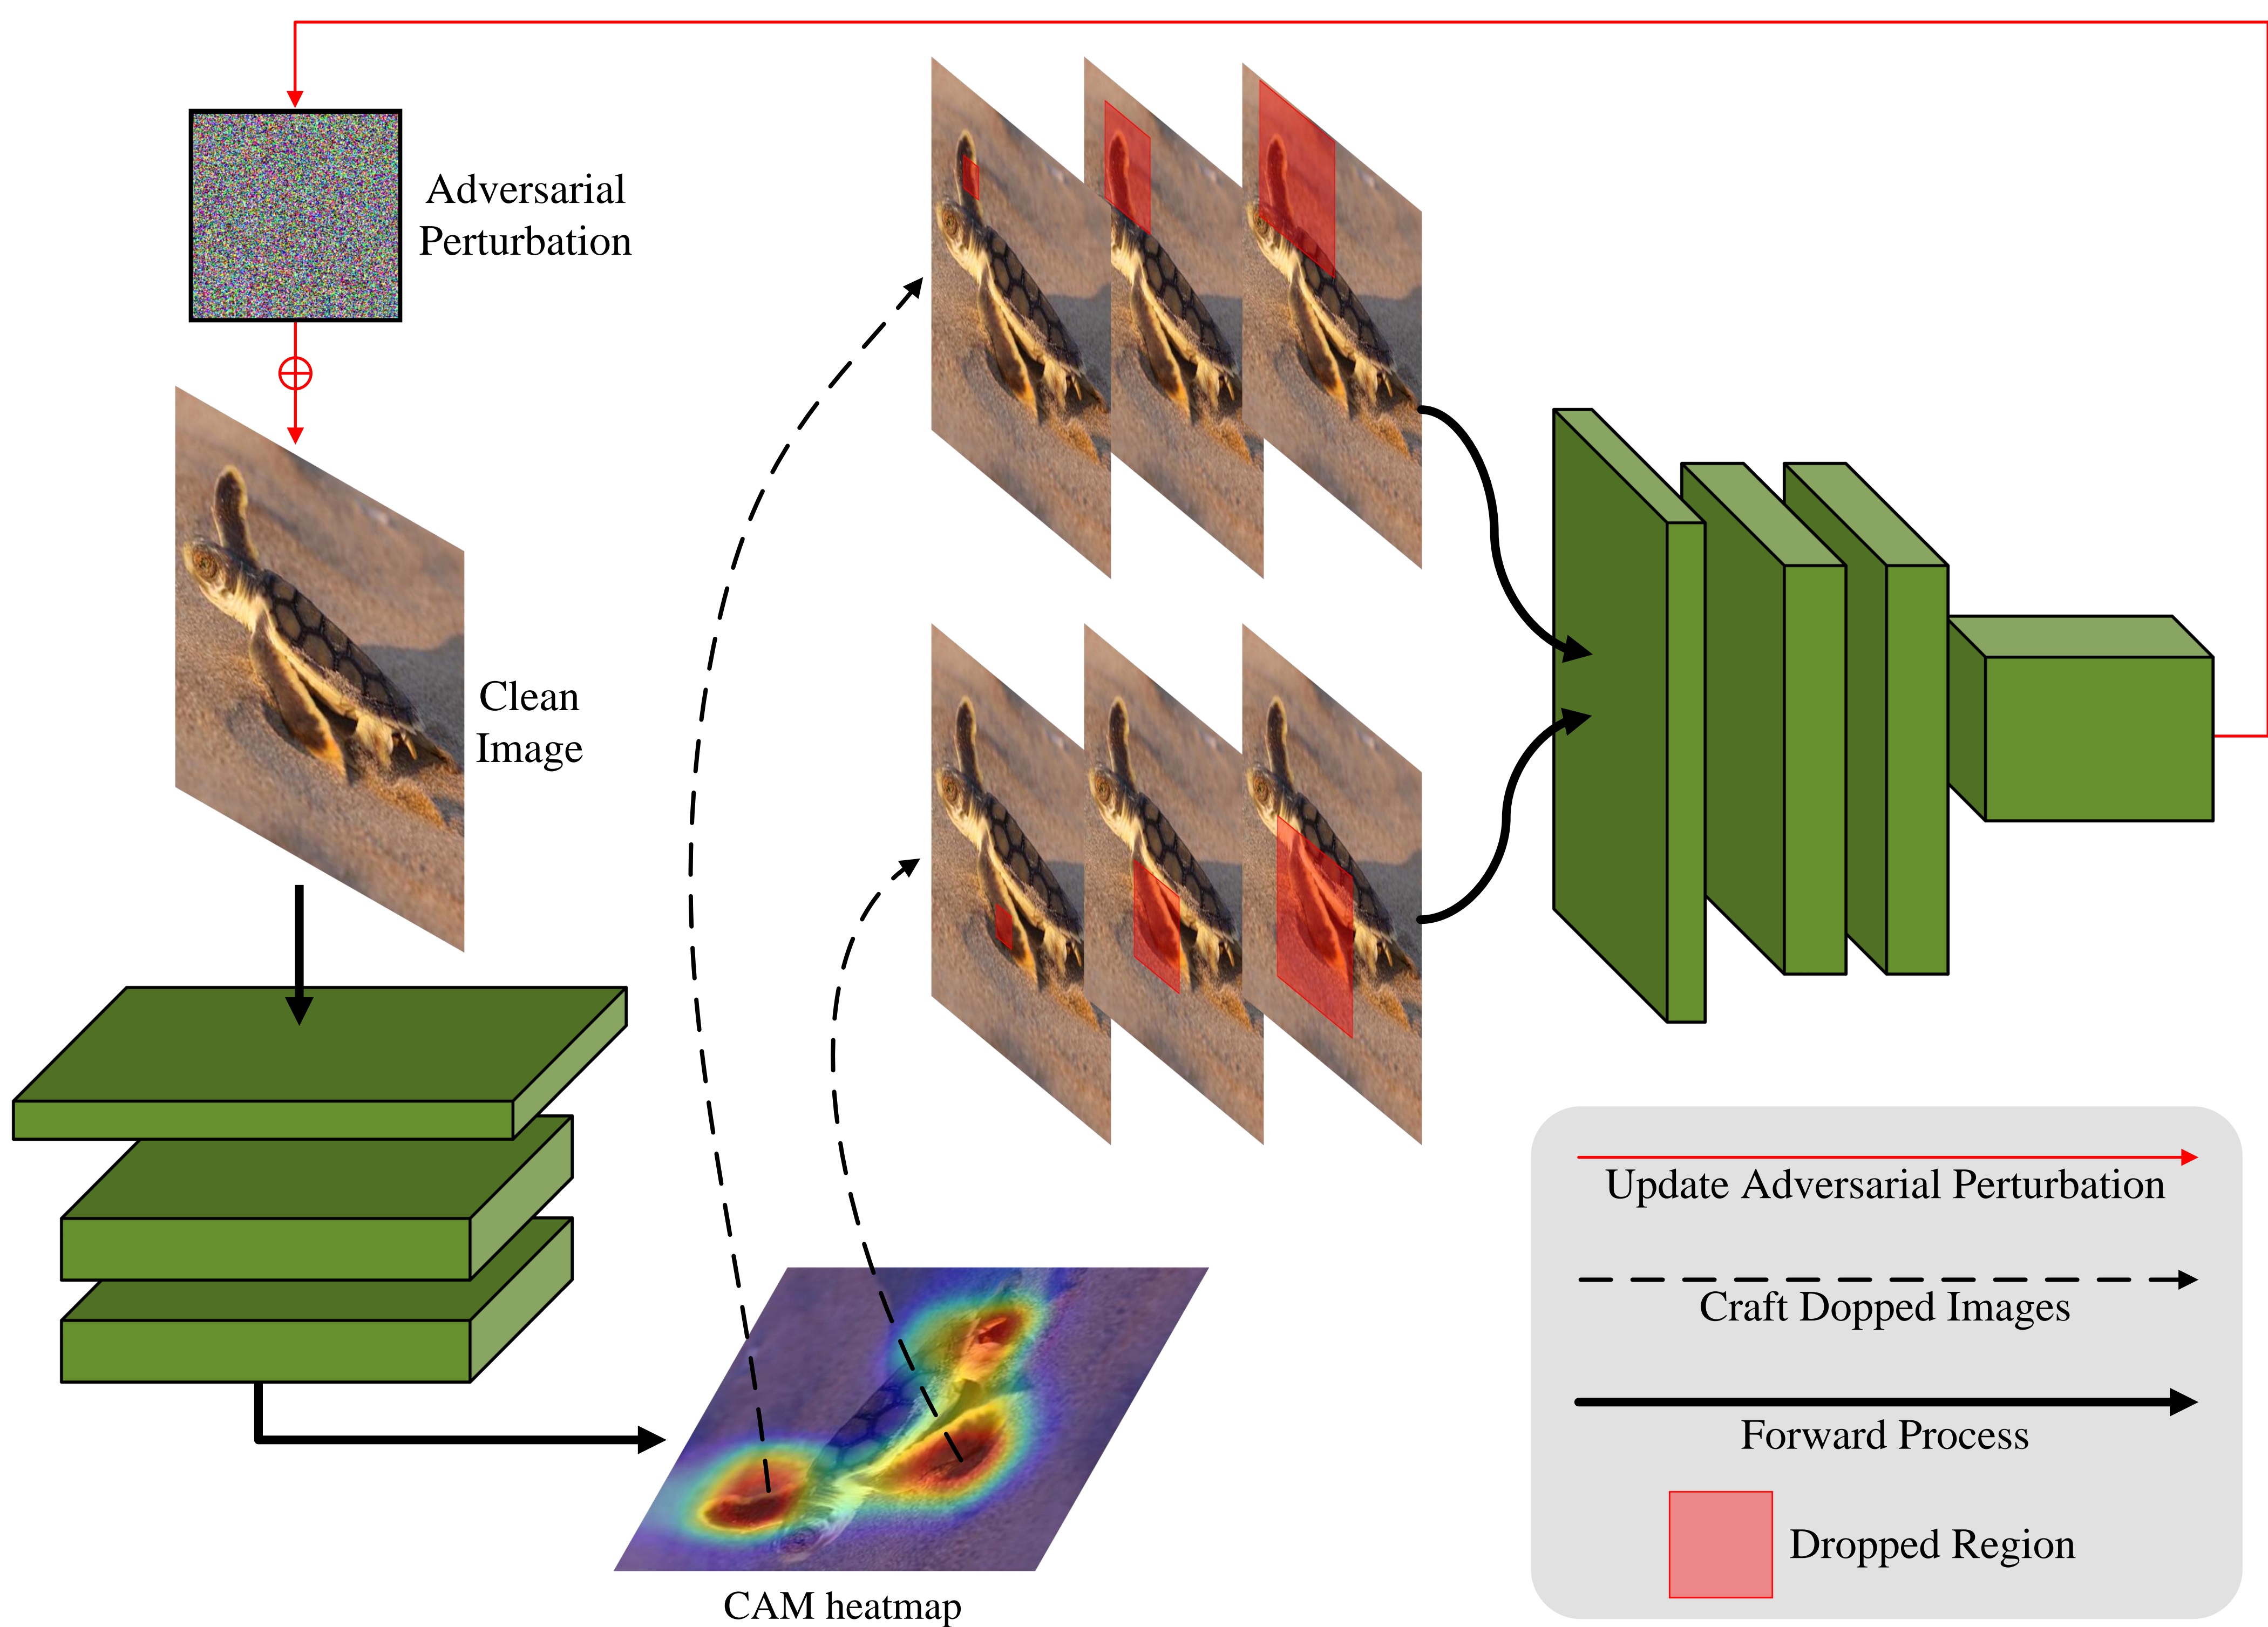

Supplement: supplementary_material [file attachment]
